# Supplementary material
Source: PubMed Central journal article supplement (PMC6763394)
Supplement: NIHMS1049572-supplement-1.pdf [file NIHMS1049572-supplement-1.pdf]

Supplemental Figure

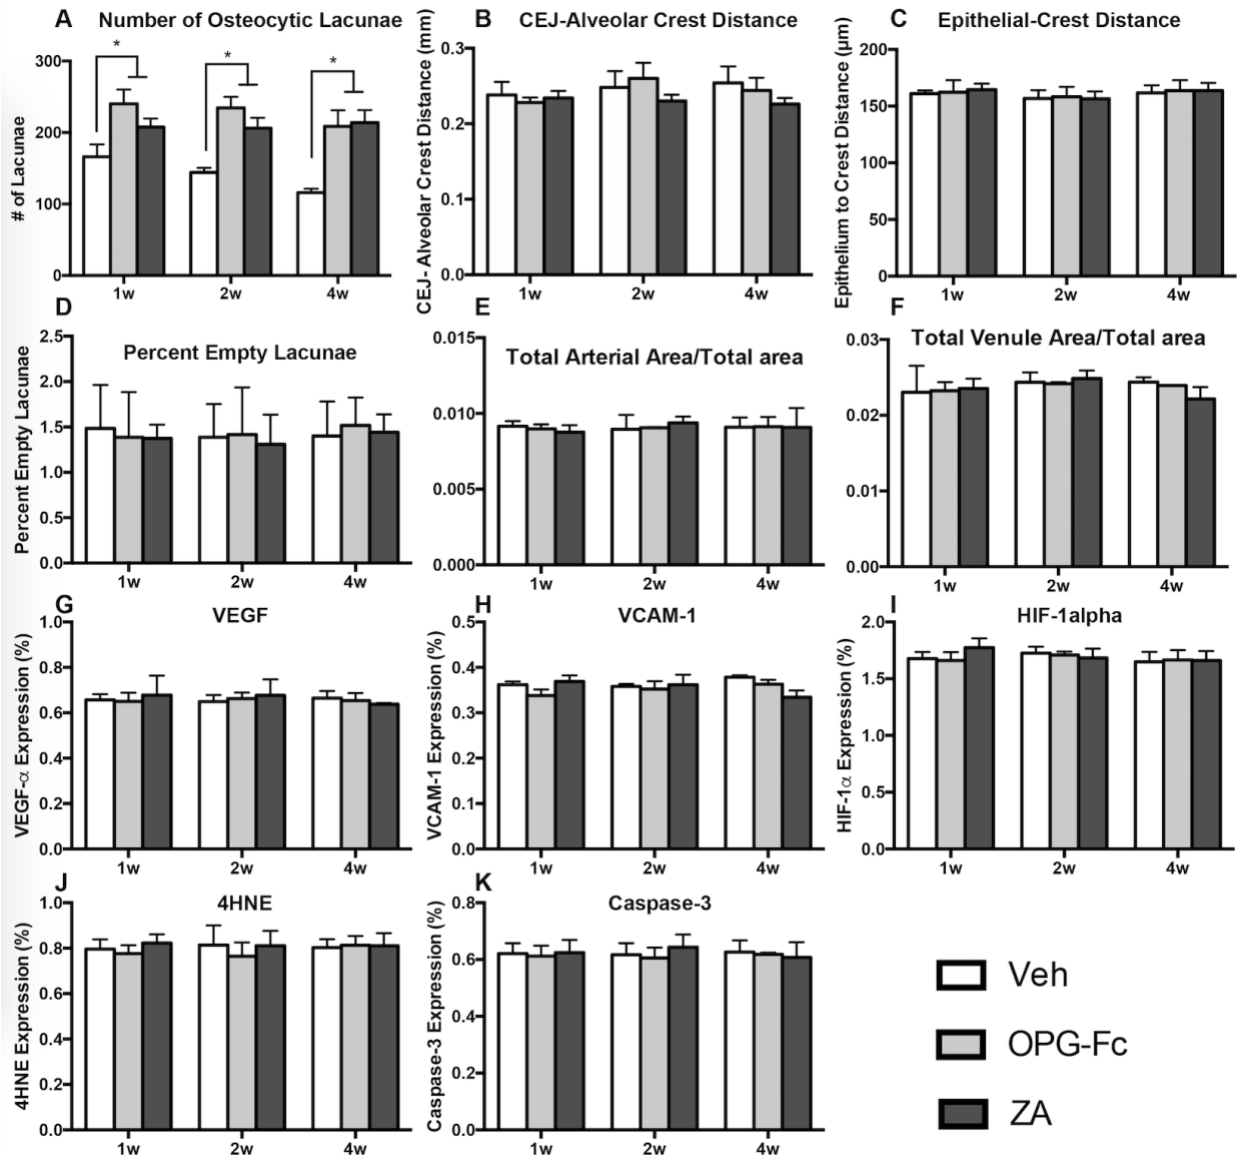

**Supplemental Figure 1: Evaluation of Number of Osteocytic Lacunae in EP sites and All Markers in non-EP Sites.**

**A)** Evaluation of Number of osteocytic lacunae evaluated in EP sites. Quantification of **B)** CEJ-Alveolar Crest Distance, **C)** Epithelial-Crest distance, **D)** Percent empty lacunae, **E)** Total Arterial Area/Total area, **F)** Total Venule Area/ Total area, **G)** VEGF Expression, **H)** VCAM-1 Expression,

**I)** HIF-1a expression, **J)** 4HNE Expression, and **K)** Caspase-3 expression in non-EP Sites. Data represents mean value  $\pm$  SEM. \* = statistical significance  $p < 0.05$ .

Supplemental Figure 1: Evaluation of Number of Empty Osteocytic Lacunae in EP sites and All Markers in non-EP Sites.
